# Supplementary material
Source: PubMed Central journal article supplement (PMC3158716)

## Supplemental statistics

Correlations were calculated between the percentage of Foxp3<sup>+</sup> cells and the alternative variables of CD44 expression, IFN $\gamma$  production, IL-4 production, IL-17 production, IL-10 production, Th1 fold-change, Th2 fold-change and Th2/Th1 ratio. The variables of CD44 expression within CD4<sup>+</sup> T cells, IFN $\gamma$  expression within CD4<sup>+</sup>CD44<sup>+</sup> T cells, IL-4 expression within CD4<sup>+</sup>CD44<sup>+</sup> T cells, IL-17 expression within CD4<sup>+</sup>CD44<sup>+</sup> T cells and IL-10 expression within CD4<sup>+</sup>CD44<sup>+</sup> T cells were percentages as measured by flow cytometry. Fold-change of Th1 and Th2 responses were calculated by using a baseline of the average % IFN $\gamma$ <sup>+</sup> (Th1) and % IL4<sup>+</sup> (Th2) within CD4<sup>+</sup>CD44<sup>+</sup> lymphocytes in control uninjected *Foxp3<sup>DTR</sup>* mice. Each individual sample was then converted to a fold-change from this baseline. The Th2/Th1 ratio was calculated as % IL4<sup>+</sup> within CD4<sup>+</sup>CD44<sup>+</sup> lymphocytes divided by the % IFN $\gamma$ <sup>+</sup> within CD4<sup>+</sup>CD44<sup>+</sup> lymphocytes for each single sample.

For each variable the relationship between the variable and the percentage of Foxp3<sup>+</sup> cells was tested by fitting to linear, exponential, quadratic and log models using JMP 7.0 software (SAS Institute). The optimal model was selected using the adjusted least-squares approach. Models were only considered significant if the correlations showed a significant non-zero relationship with a p<0.0011 (Bonferroni-corrected p-value for 9 variable analysis with an alpha value for significance set at 0.01). The significance of differences between the relationships between the percent of Foxp3<sup>+</sup> cells and Th1-fold change vs Th2-fold change was calculated by subtracting the value of Th1-fold change from the value of Th2-fold change for each mouse, and testing the resulting values for a relationship with Foxp3<sup>+</sup> cells, which gave a significant non-zero relationship (p<0.0001) in both lymph nodes and spleen.

### *Best-fit models for each variable against % Foxp3*

T-cell activation in the lymph nodes:

Non-zero relationship with %Foxp3, p < 0.0001

$$T_{act} = [65 - 3.0 \times (\% Foxp3)]$$

Goodness of fit,  $r^2 = 0.64$

IFN $\gamma$  production in the lymph nodes:

Non-zero relationship with %Foxp3, p < 0.0001

$$IFN\gamma = [23 - 1.4 \times (\% Foxp3)]$$

Goodness of fit,  $r^2 = 0.78$

IL-4 production in the lymph nodes:

Non-zero relationship with %Foxp3, p < 0.0001

$$IL - 4 = [e^{2.9 - 0.24 \times (\% Foxp3)}]$$

Goodness of fit,  $r^2 = 0.77$

IL-17 production in the lymph nodes:

Relationship with %Foxp3 not significant to p<0.01

IL-10 production in the lymph nodes:

Relationship with %Foxp3 not significant to  $p < 0.01$

Th1-fold change in the lymph nodes:

Non-zero relationship with %Foxp3,  $p < 0.0001$

$$\Delta Th1 = [5.2 - 0.3 \times (\% Foxp3)]$$

Goodness of fit,  $r^2 = 0.78$

Th2-fold change in the lymph nodes:

Non-zero relationship with %Foxp3,  $p < 0.0001$

$$\Delta Th2 = [e^{3.1 - 0.24 \times (\% Foxp3)}]$$

Goodness of fit,  $r^2 = 0.77$

Th bias in the lymph nodes:

Non-zero relationship with %Foxp3,  $p < 0.0001$

$$\frac{Th2}{Th1} = [0.75 - 0.22 \times \log_e (\% Foxp3)]$$

Goodness of fit,  $r^2 = 0.62$

T-cell activation in the spleen:

Relationship with %Foxp3 not significant to  $p < 0.01$

IFN $\gamma$  production in the spleen:

Non-zero relationship with %Foxp3,  $p < 0.001$

$$IFN\gamma = [37 - 0.8 \times (\% Foxp3)]$$

Goodness of fit,  $r^2 = 0.28$

IL-4 production in the spleen:

Non-zero relationship with %Foxp3,  $p < 0.0001$

$$IL - 4 = [15 - 4.9 \times \log_e (\% Foxp3)]$$

Goodness of fit,  $r^2 = 0.78$

IL-17 production in the spleen:

Relationship with %Foxp3 not significant to  $p < 0.01$

IL-10 production in the spleen:

Relationship with %Foxp3 not significant to  $p < 0.01$

Th1-fold change in the spleen:

Non-zero relationship with %Foxp3,  $p < 0.001$

$$\Delta Th1 = [1.8 - 0.04 \times (\% Foxp3)]$$

Goodness of fit,  $r^2 = 0.28$

Th2-fold change in the spleen:

Non-zero relationship with %Foxp3,  $p < 0.0001$

$$\Delta Th2 = [7.3 - 2.4 \times \log_e (\% Foxp3)]$$

Goodness of fit,  $r^2 = 0.78$

Th bias in the spleen:

Non-zero relationship with %Foxp3,  $p < 0.0001$

$$\frac{Th2}{Th1} = [0.45 - 0.14 \times \log_e (\% Foxp3)]$$

Goodness of fit,  $r^2 = 0.64$

**Figure S1. The relationship between induction of T-cell activation and Treg ablation across anatomical location**

Tregs were ablated via the injection of limiting concentrations of DT (0, 2.5, 5.0, 7.5, 10 and 20 $\mu$ g/kg diphtheria toxin), with measurement 9 days after first treatment. (A) Representative flow cytometry profiles of a titration series of *Foxp3<sup>DTR</sup>* mice injected with limiting DT, displaying the percentage of CD4<sup>+</sup> T cells positive for both Foxp3 and the DTR-GFP fusion protein. (B) The correlation between T<sub>reg</sub> cell frequency in the spleen and lymph nodes after diphtheria toxin treatment. (C) The relationship between T<sub>reg</sub> cell frequency and upregulation of CD44 on CD4<sup>+</sup>Foxp3<sup>-</sup> T cells in the spleen. In both (B) and (C), diamonds represent individual mice and the trend line represents the optimal model for relationship fitting using the least-squares approach. *r*<sup>2</sup> values are the goodness of fit and *p* values show significance of a non-zero relationship.

**Figure S2. IL-17 and IL-10 production show low sensitivity to titrated Treg depletion**

CD4<sup>+</sup>CD44<sup>+</sup> T-cell subsets were assessed for production of IL-17 and IL-10 after injection of limiting concentrations of DT in *Foxp3<sup>DTR</sup>* mice. Diamonds represent individual mice. All data is presented from pooled lymph nodes. (A) The relationship between Treg frequency and IL-17 production by CD4<sup>+</sup>CD44<sup>hi</sup>Foxp3<sup>-</sup> T cells. (B) The relationship between Treg frequency and IL-10 production by CD4<sup>+</sup>CD44<sup>hi</sup>Foxp3<sup>-</sup> T cells.

**Figure S3. Strong correlation between cytokine responses in the lymph nodes and spleen**

Cytokine production by CD4<sup>+</sup> T-cell subsets were assessed after injection of limiting concentrations of DT in *Foxp3<sup>DTR</sup>* mice. The relationship between spleen and lymph node values was assessed for (A) IFN $\gamma$  production within CD4<sup>+</sup>CD44<sup>hi</sup>Foxp3<sup>-</sup> cells, (B) IL-4 production within CD4<sup>+</sup>CD44<sup>hi</sup>Foxp3<sup>-</sup> cells, (C) IL-17 production within CD4<sup>+</sup>CD44<sup>hi</sup>Foxp3<sup>-</sup> cells, (D) IL-10 production within CD4<sup>+</sup>CD44<sup>hi</sup>Foxp3<sup>-</sup> cells, and (E) Th2/Th1 ratio.

**Figure S4. The relationship between effector T-cell subsets and Treg ablation in the spleen**

Cytokine production in CD4<sup>+</sup>CD44<sup>+</sup> T cells after injection of limiting concentrations of DT in *Foxp3<sup>DTR</sup>* mice. (A) Representative flow cytometry profiles showing staining for CD44 and IFN $\gamma$  (*upper*), and CD44 and IL-4 (*lower*), by CD4<sup>+</sup> Foxp3<sup>-</sup> T cells. (B,C) The relationship between Treg frequency and (B) IFN $\gamma$  or (C) IL-4 production by CD4<sup>+</sup>CD44<sup>hi</sup>Foxp3<sup>-</sup> T cells. (D) The relationship between Treg frequency and fold-change in IL-4 (empty diamonds) and IFN $\gamma$  (filled diamonds) production by CD4<sup>+</sup>CD44<sup>hi</sup>Foxp3<sup>-</sup> T cells. (E) The relationship between Treg frequency and the IL-4<sup>+</sup>(Th2):IFN $\gamma$ <sup>+</sup>(Th1) ratio. (F,G) The relationship between Treg frequency and (F) IL-17 and (G) IL-10 production by CD4<sup>+</sup>CD44<sup>hi</sup>Foxp3<sup>-</sup> T cells. (B–G) Diamonds represent individual mice and the trend line represents the optimal model for relationship fitting using the least-squares approach. *r*<sup>2</sup> values are the goodness of fit and *p* values show significance of a non-zero relationship.

**Figure S5. Rapid restoration of lymph node Th2 suppression by Treg transfer**

The magnitude and Th bias was compared for wildtype mice ('WT'), *Foxp3<sup>DTR</sup>* mice injected with DT ('DTR'), and *Foxp3<sup>DTR</sup> Ly5.1* mice injected with DT (on day 0) and then injected with at  $5 \times 10^6$  *Ly5.2 Foxp3<sup>GFP</sup>* CD4 T cells 7 days later ('i.v.Treg'). (A) Cellularity of pooled lymph nodes. (B) Proportion of T-cell activation, as measured by CD44 expression on CD4<sup>+</sup> T cells. (C) Frequency of CD4<sup>+</sup>CD44<sup>hi</sup>Foxp3<sup>-</sup> T cells producing IL-4 (empty bars) and IFN $\gamma$  (filled bars).

Within the i.v.Treg group, only the responses within the host Ly5.1<sup>+</sup> cells were measured. n=3/group.

**Figure S6. Asymmetric splenic induction of Th1 vs Th2 apoptosis by Tregs**

The effect of Tregs on the proliferation and apoptosis of Th1 and Th2 cells was determined by measurement of BrdU incorporation, Ki67 expression and activated Caspase 3 expression within IL-4<sup>-</sup> and IFN $\gamma$ -producing cells in the spleen of wildtype and DT-treated *Foxp3<sup>DTR</sup>* mice. (A) Wildtype and DT-treated *Foxp3<sup>DTR</sup>* mice were treated daily with BrdU from the time of DT administration, and incorporation was measured in IFN $\gamma$ -expressing Th1 cells and IL-4<sup>-</sup> expressing Th2 cells (n=5/group). (B) Ki67 expression in Th1 and Th2 subsets of wildtype and DT-treated *Foxp3<sup>DTR</sup>* mice (n=9,11). (C) Activated Caspase 3 expression in Th1 and Th2 subsets of wildtype and DT-treated *Foxp3<sup>DTR</sup>* mice (n=9,11). (D) The effect of Tregs on Th1 and Th2 subsets, measured by calculating the percentage change in Ki67 and activated caspase 3 expression in wildtype versus DT-treated *Foxp3<sup>DTR</sup>* mice. Each diamond represents an individual wildtype mouse (n=9), normalized to the average value of DT-treated *Foxp3<sup>DTR</sup>* mice (n=11).

**Figure S7. CTLA4-Ig can substitute for Tregs in restoring effector T-cell bias**

Wildtype and DT-treated *Foxp3<sup>DTR</sup>* mice were compared to DT-treated *Foxp3<sup>DTR</sup>* mice treated with CTLA4-Ig on day 0, 5 or 7. (A) Frequency of IL-4<sup>-</sup> and IFN $\gamma$ -producers among CD4<sup>+</sup>CD44<sup>hi</sup>Foxp3<sup>-</sup> T cells and (B) Th2:Th1 ratio in wildtype mice, DT-treated *Foxp3<sup>DTR</sup>* mice and DT- and CTLA4-Ig-treated *Foxp3<sup>DTR</sup>* mice and DT- and anti-IL-2-treated *Foxp3<sup>DTR</sup>* mice, after 9 days of treatment with DT. All data is from pooled lymph nodes (n=15, 14, 4, 12, 3).

Figure S1

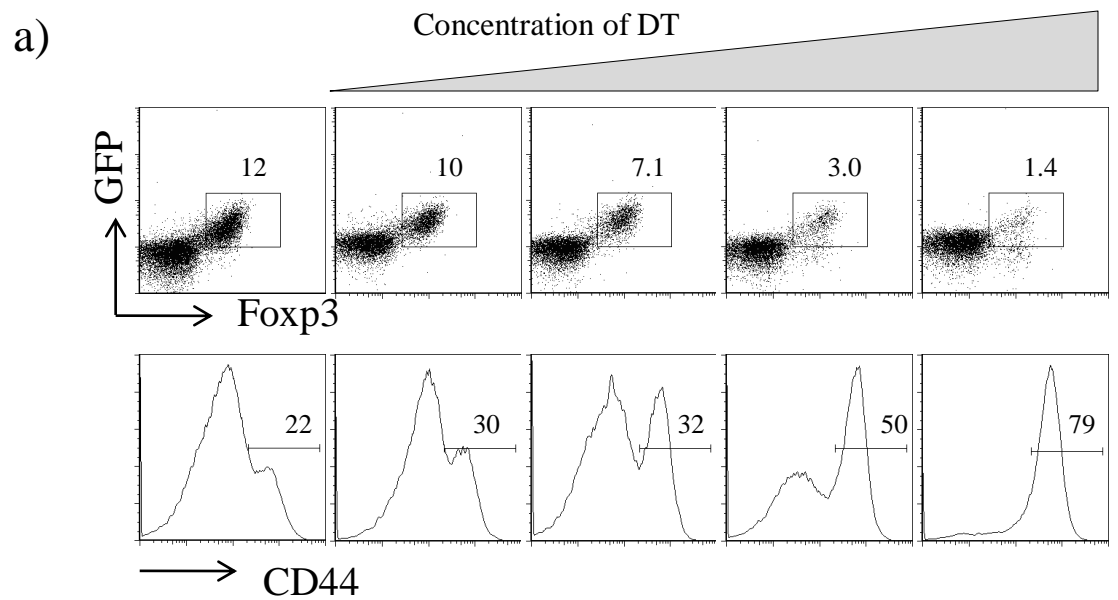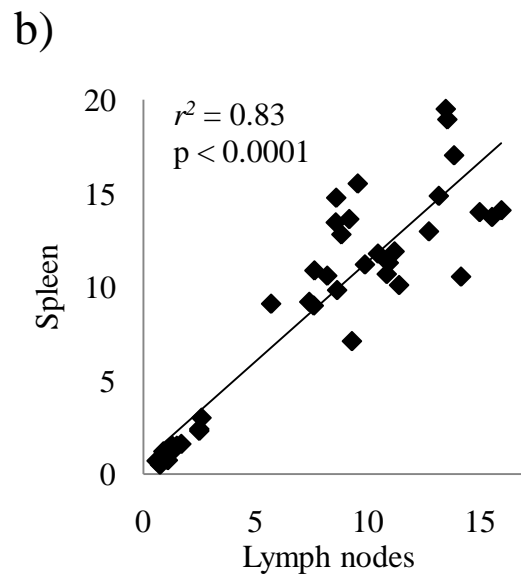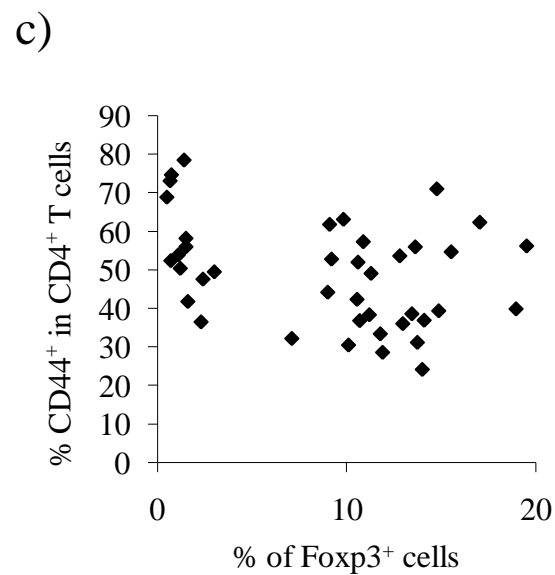

Figure S2

a)

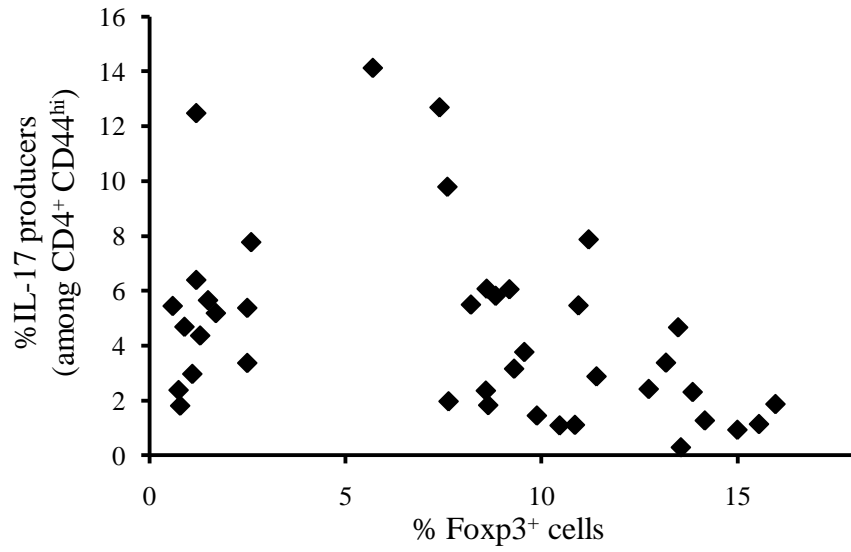

b)

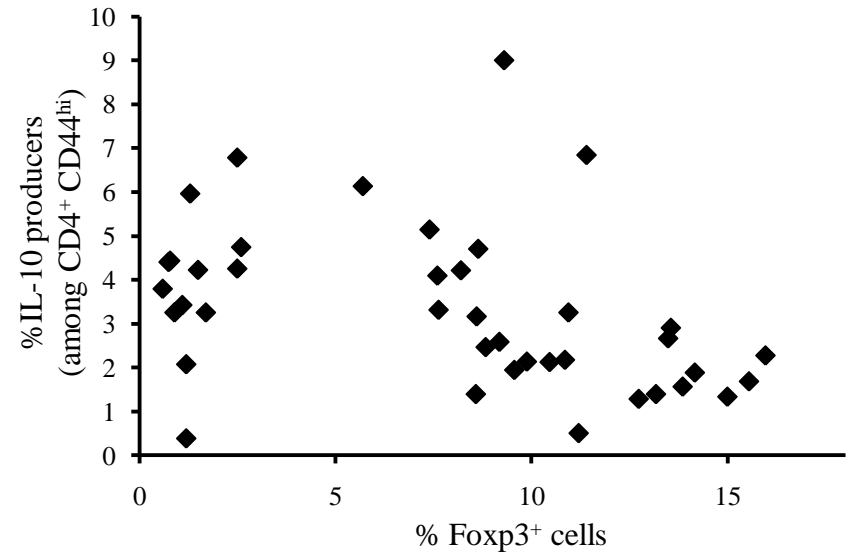

Figure S3

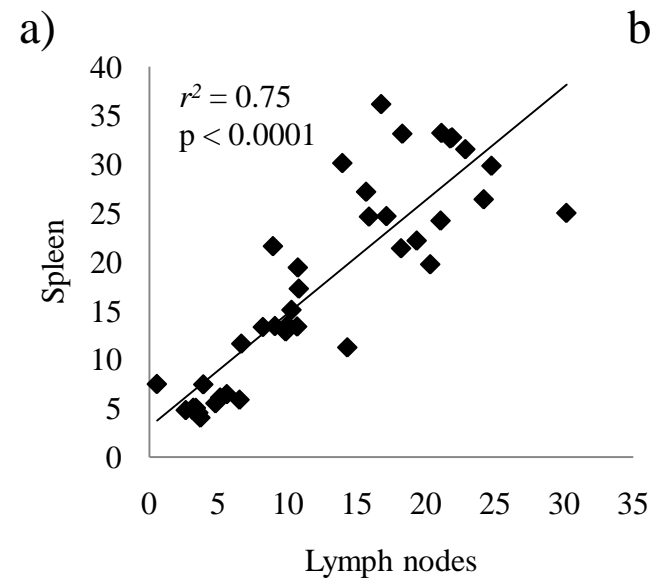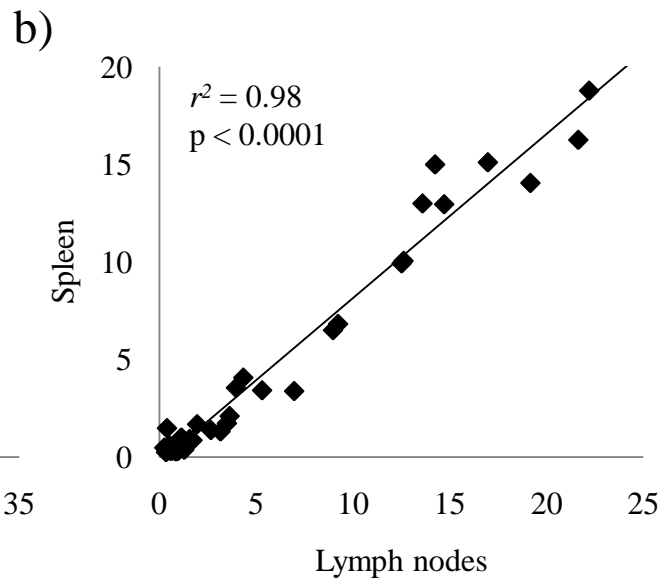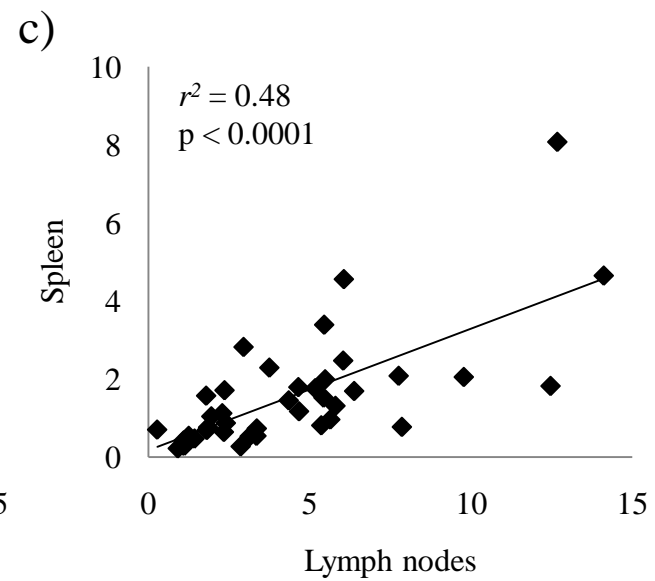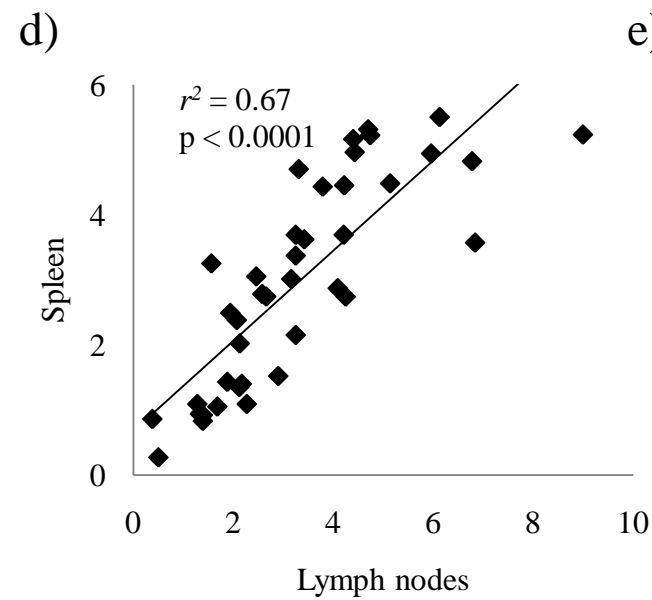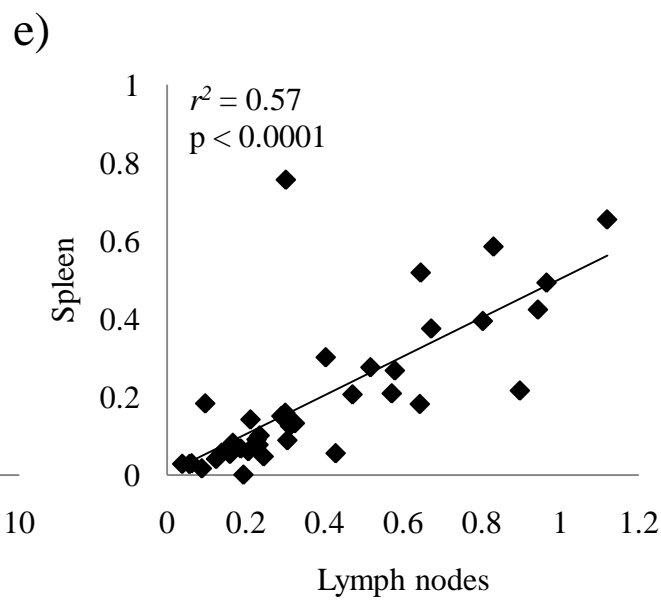



Figure S4

Concentration of DT

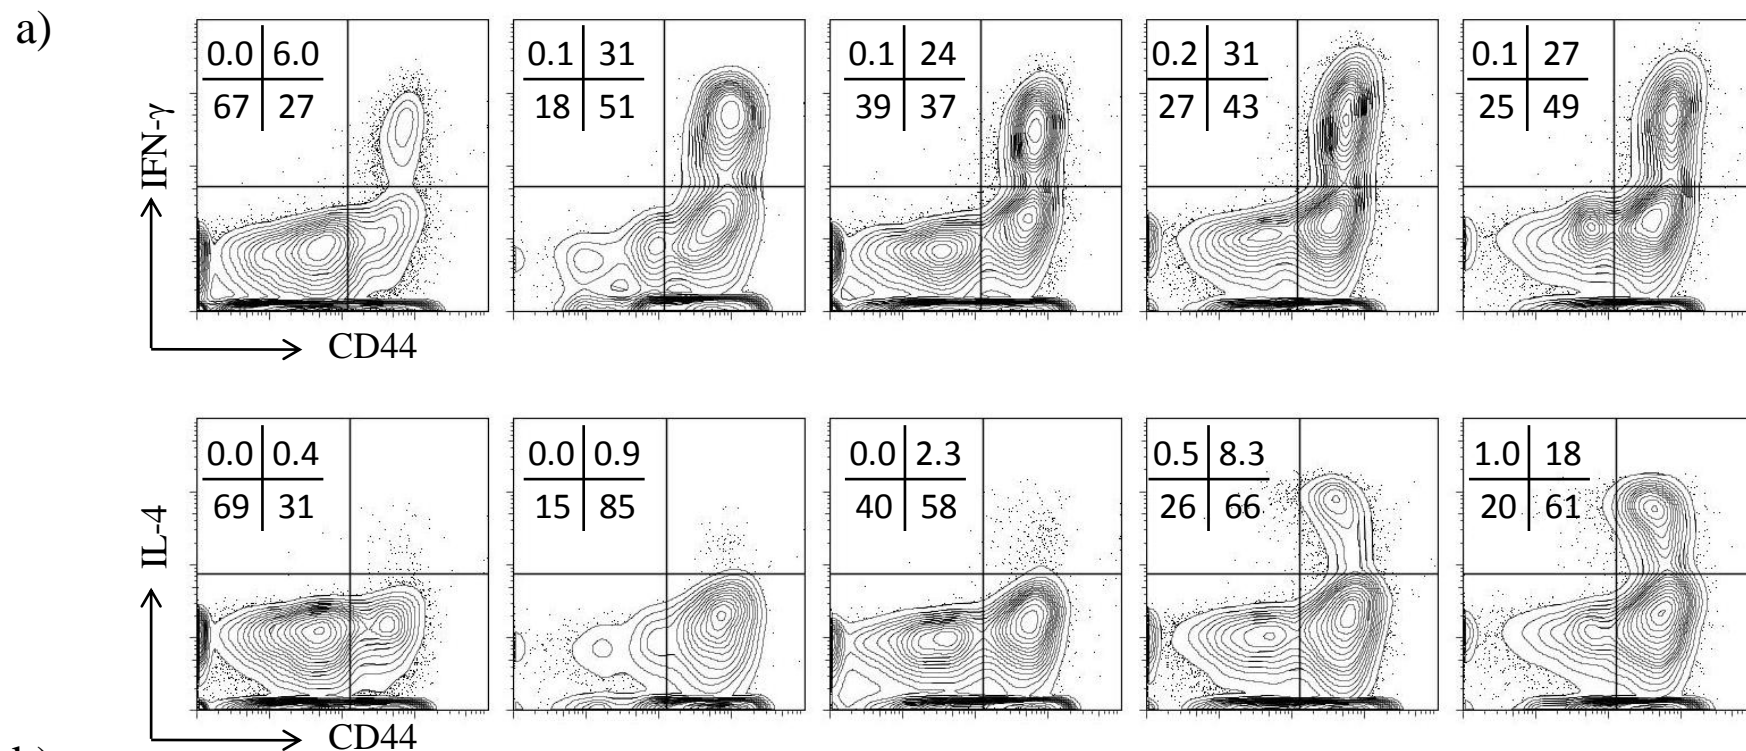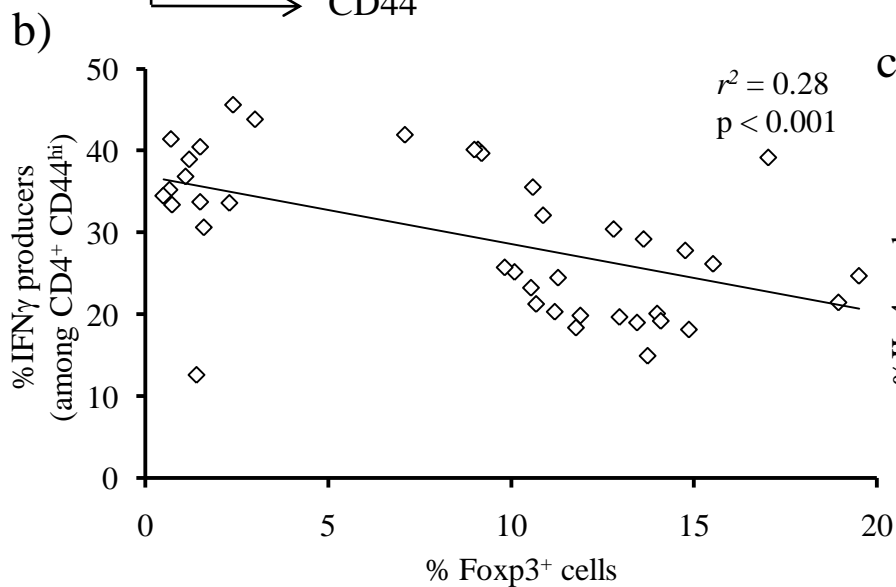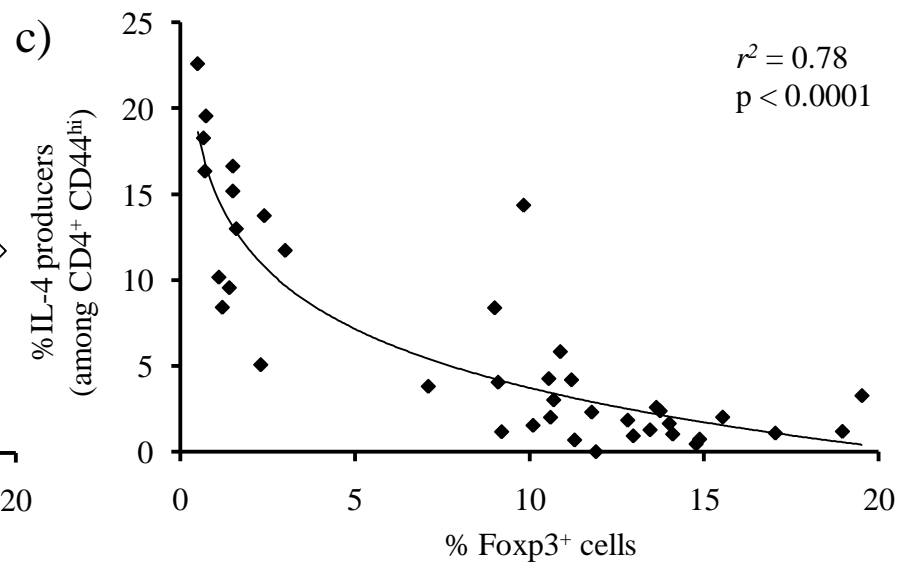

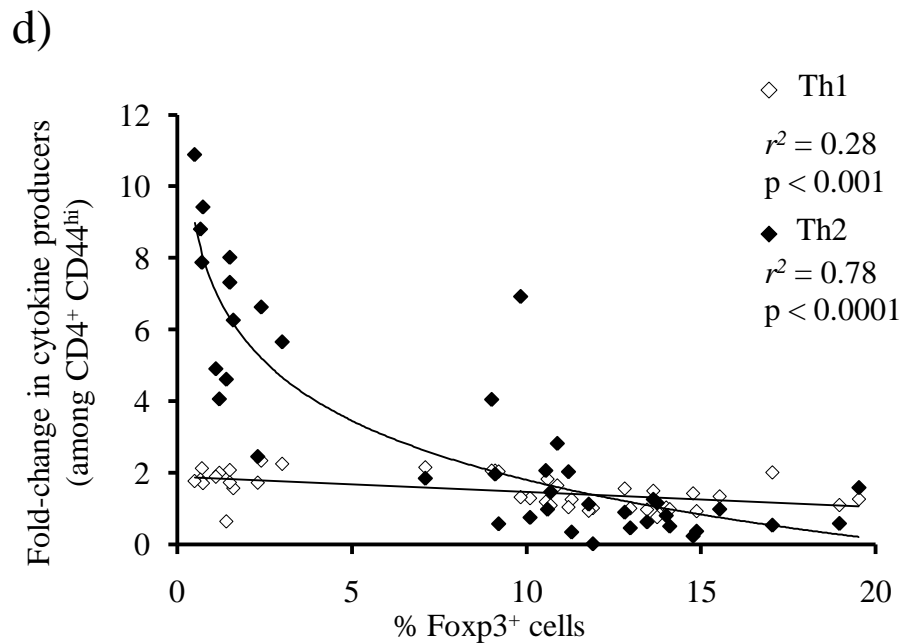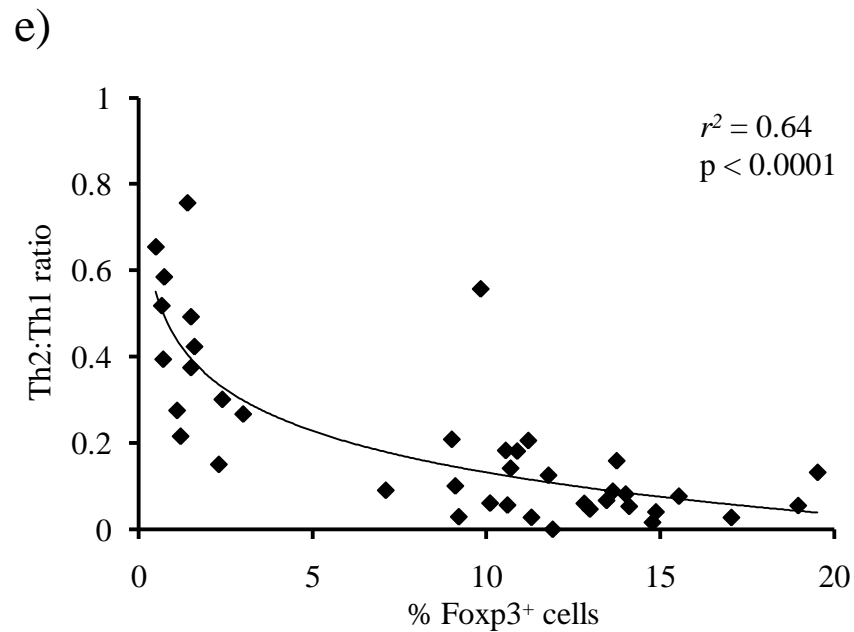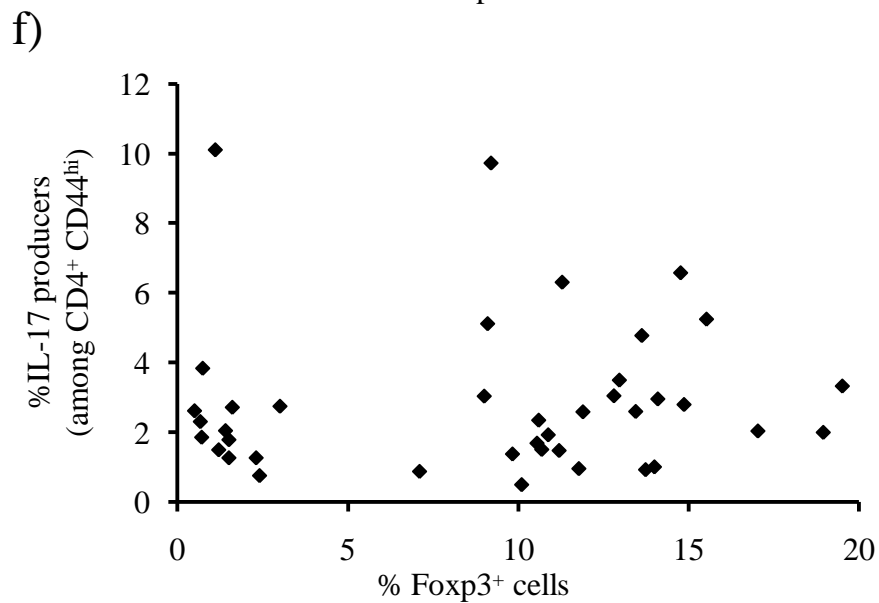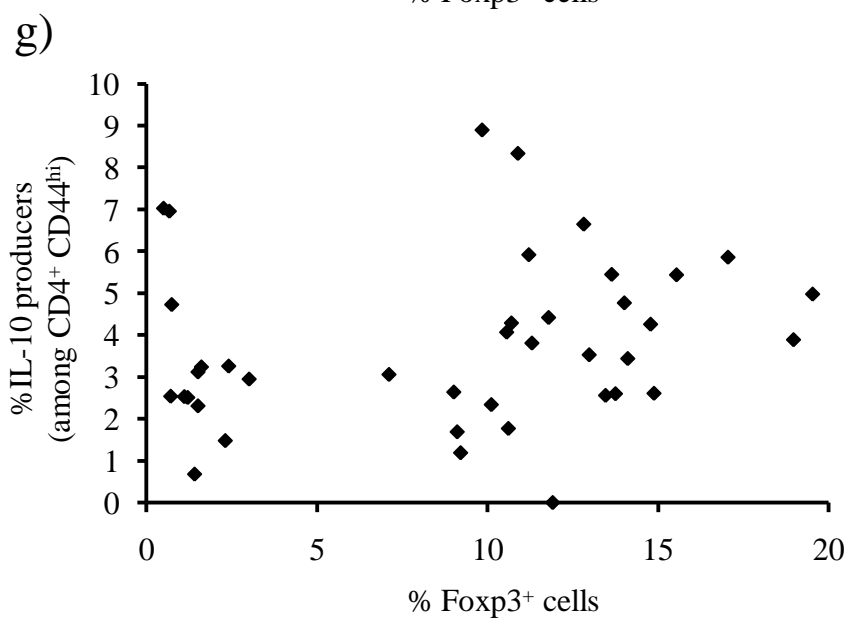

Figure S5

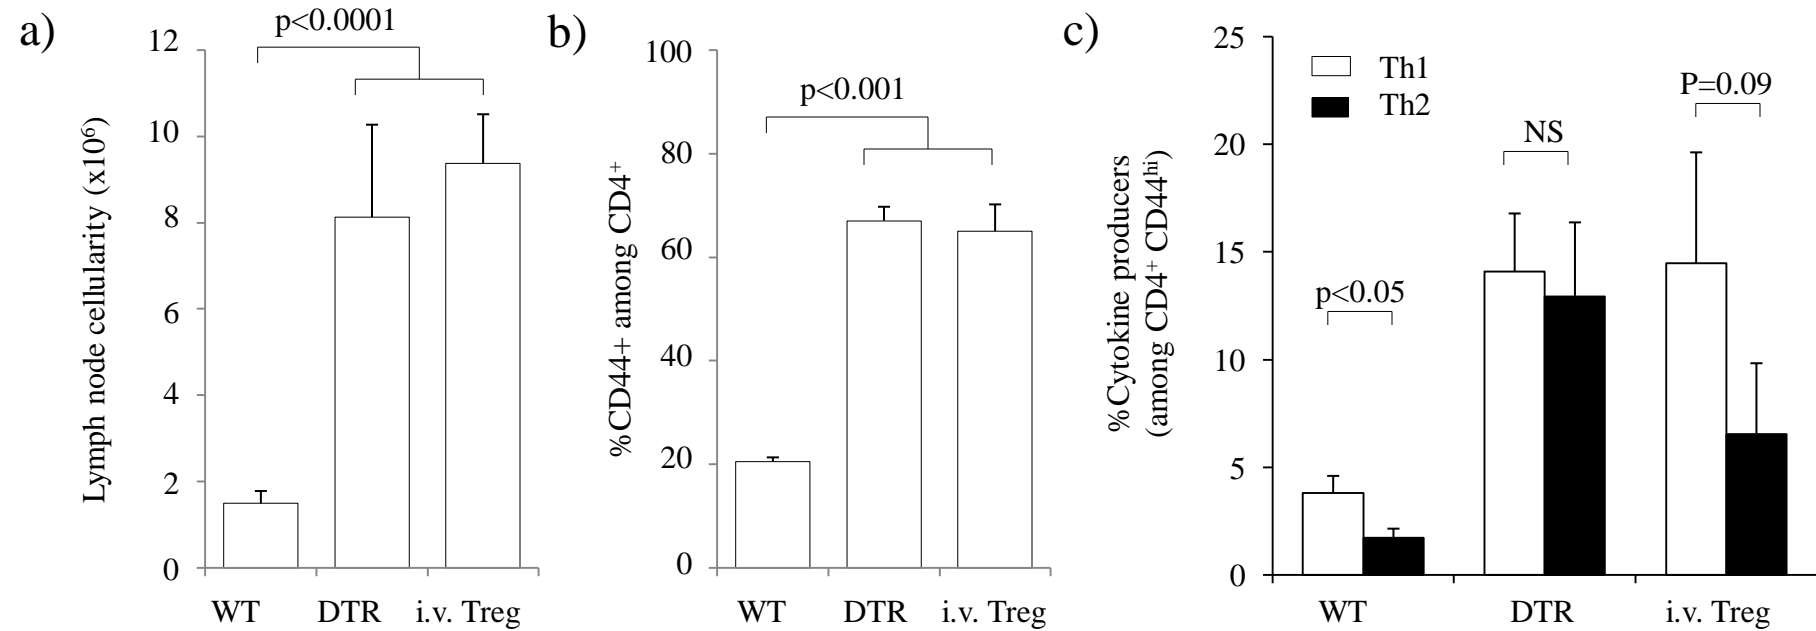

Figure S6

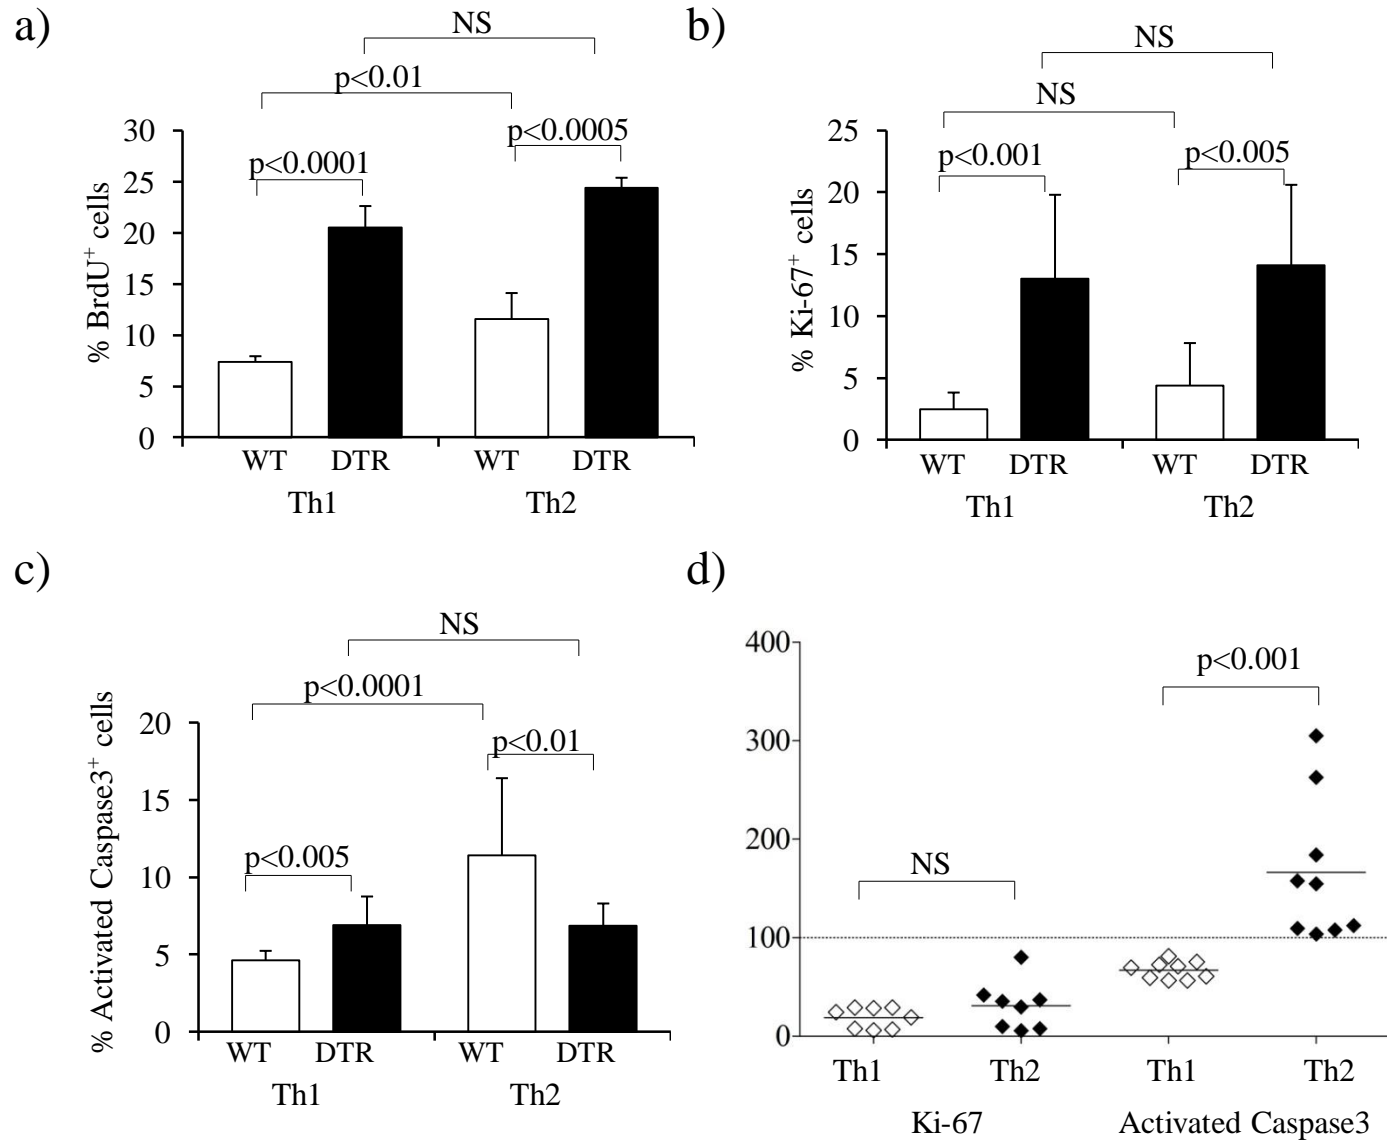

Figure S7

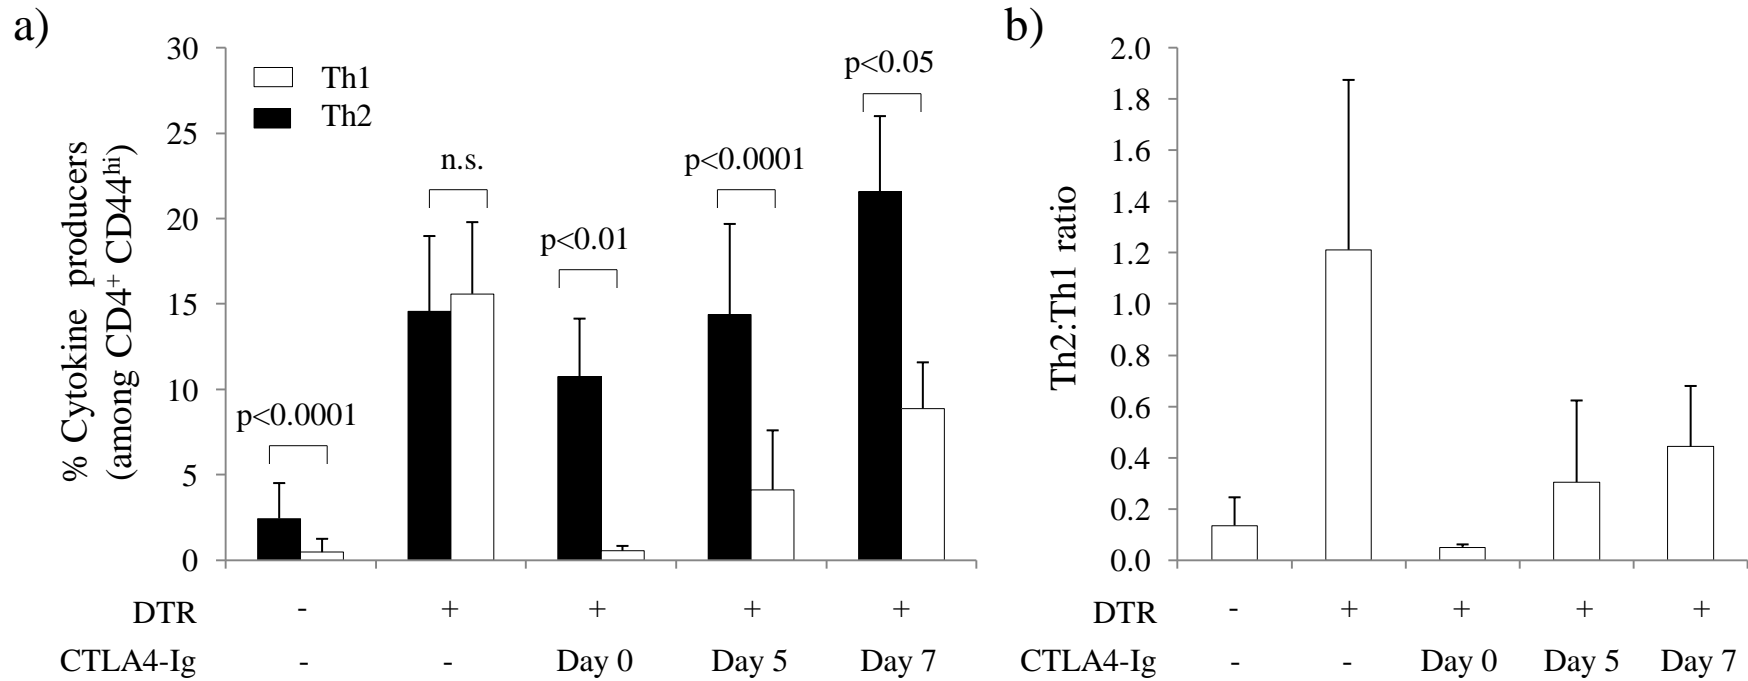

Supplement: supp_blood-2011-04-346056_blood-2011-04-346056-1.pdf [file supp_blood-2011-04-346056_blood-2011-04-346056-1.pdf]
